# Supplementary material
Source: PubMed Central journal article supplement (PMC1994663)

## **Supplemental Data**

### **Histone Methylation-Dependent Mechanisms Impose Ligand Dependency for Gene Activation by Nuclear Receptors**

Ivan Garcia-Bassets, Young-Soo Kwon, Francesca Telese, Gratien G. Prefontaine, Kasey R. Hutt, Christine S. Cheng, Bong-Gun Ju, Kenneth A. Ohgi, Jianxun Wang, Laure Escoubet-Lozach, David W. Rose, Christopher K. Glass, Xiang-Dong Fu, and Michael G. Rosenfeld

## **SUPPLEMENTAL EXPERIMENTAL PROCEDURES**

### **Materials and Reagents**

The following commercial available antibodies were used:  $\alpha$ -ER $\alpha$ , CBP, and Pol II from Santa Cruz Biotechnology,  $\alpha$ -dimethylH3K4, acH3K9, and ESET from Upstate Biotechnology,  $\alpha$ -BHC110 from Bethyl Laboratories,  $\alpha$ -dimeH3-K9 and RIZ1 from Abcam, and  $\alpha$ -RIZ1 from Orbigen. 17- $\beta$ -Estradiol (E<sub>2</sub>), 4-hydroxytamoxifen (4-OHT), and Dihydrotestosterone (DHT) were purchased from Sigma. TNF $\alpha$  and RA were from R&D Systems. Human IL-1 $\beta$  from Calbiochem. The concentrations of treatment were: E<sub>2</sub> (100 nM), 4-OHT (1  $\mu$ M), DHT (20 nM), RA (1 $\mu$ M), IL-1 $\beta$  (10 ng/ml), TNF $\alpha$  (10 ng/ml). The specific and non-specific control siRNAs were purchased from Qiagen.

### **ChIP-DSL analysis**

The ChIP-DSL assays were carried out as described in [Kwon et al., 2007](#). Briefly, the ChIP-DSL technology utilizes a 40mer array for hybridization. Each 40mer corresponds to a unique genomic sequence identified by computational search. For promoter profiling, each such probe corresponds to a proximal promoter region from +200 nt to -800 nt relative to the transcriptional start site. For tiling profiling, each probe represents a 0.5 kb non-repetitive

genomic block in a path to be tiled. Amine-modified 40mers are spotted onto solid support to form an array.

The assay begins with the standard ChIP procedure. About  $1 \times 10^6$  cells were used for each ChIP-DSL experiments. Both input (5% of total DNA) and antibody-enriched DNA were isolated and randomly biotinylated. Then annealed independently to a mixture of 20,045 oligonucleotide pairs, each of which targets to a specific 40mer promoter sequence in the human genome. Each oligonucleotide consists of one half of the corresponding 40mer sequence, flanked by a universal primer-landing site (T3 for the upstream and T7 for the downstream oligonucleotides). After annealing, streptavidin beads are used to select annealed oligonucleotides templated by input or ChIPed DNA and later, free oligonucleotides are removed by sequential washes. Then, precisely paired oligonucleotides are ligated on beads by the Taq ligase. Through this DNA Selection and Ligation (DSL) step, only correctly targeted oligonucleotide pairs are converted from half to complete amplicons, which are PCR-amplified by using the universal T3 and T7 primers. One of the primers is end-labeled with Alexa dye (for total genomic control) or Cy3 dye (for ChIPed DNA), and the PCR products are co-hybridized to the 40mer array (Hu20K or tiling array) to derive enrichment ratio for each target. For data analysis, the single error model was applied as previously described ([Li et al. 2003](#); [Ren and Dynlacht, 2004](#)).

### **Single-Cell Nuclear Microinjection Assays and *LacZ* Reporter Assays**

Microinjection assays were carried out as previously described ([Kamei et al., 1996](#); [Jepsen et al., 2000](#)). Briefly, each experiment was performed on three independent cover slips consisting of 1,000 cells, with >300 cells injected. Where no experimental siRNA was used,

*unspecific* or *GST* control siRNA was microinjected. Injected cells were distinguished from un-injected cells by the co-injection of an inert dextran that is fluorescently labeled. Approximately 1 hr after injection, the cells were treated, where indicated, with ligands/reagents. After overnight expression, the cells were fixed with 3.7% formaldehyde and then subjected to X-gal staining. Results were quantitated after X-gal staining, and each fluorescent injected cell was individually scored as positive or negative for *LacZ* expression.

### Quantitative ChIP-PCR (ChIP/qPCR)

Specific PCR primers designed surrounding a region of 150-250 bp from the DSL probe were used to determine enrichment of specific sequences by ChIP assay. This enrichment was determined by quantitative real time PCR and SYBR Green-detection (Stratagene) on a Mx300P System (Stratagene). PCR reactions typically used 1  $\mu$ L of sample from 60  $\mu$ L DNA extraction. Length of PCR products was confirmed by agarose gel. Fold enrichment ratios were calculated from experimental Ct values, previously normalized against Ct values from IgG control, and then input percentages were calculated compared to serial diluted input samples.

| ChIP/qPCR PRIMERS LIST |                      |                       |           |                             |
|------------------------|----------------------|-----------------------|-----------|-----------------------------|
| PROMOTER               | FORWARD PRIMER       | REVERSE PRIMER        | Band Size | Verification on agarose gel |
| ABP1/DAO               | GAAATGGCCCCTTGCCT    | GCCTATGGCTTGGGAGGT    | 219 bp    | OK                          |
| DSCR3                  | GAGGGATTGTGGGTGTTCC  | GGCAGATTCACCTCCAGCTTT | 158 bp    | OK                          |
| BLVRB/SPTBN4           | GCCACGCCTCAGACTCTC   | GGGCGCTGAGTGACAAGT    | 211 bp    | OK                          |
| C11ORF30/EMSY          | GGGTATGCAGGAGAAACCAA | AGATGGCGACAGGTAACAGG  | 274 bp    | OK                          |
| C21ORF13               | GCCTGGAGGTCAGTGTGG   | GTGACAGGCTCCCTCGTCT   | 152 bp    | OK                          |
| CBX5/HNRPA1            | TCTCAGAGGCAGGTGGAAC  | TTCCACGCGCAAATATTACA  | 173 bp    | OK                          |
| CCND1                  | GCCGGCCTTCTAGTTGT    | GCCCTGTAGTCCGGTTT     | 167 bp    | OK                          |
| CRKL                   | CAGTCCTTGACCTCCCTCAG | GGCAGGAAAACAGCTGGAG   | 151 bp    | OK                          |
| DDX17                  | AAGTACGGAGCGAGCGTAGA | GAGATCGGAATCAGGCAAAA  | 184 bp    | OK                          |
| ESR1                   | GTCTCCCCAGGGTCATC    | CCAGGGAAGACTGGGCTTA   | 186 bp    | OK                          |
| GAPD                   | TCCTCCTGTTTCATCCAAGC | TAGTAGCCGGGCCCTACTTT  | 219 bp    | OK                          |
| GMIP                   | CCTGACCTGGGCATCCTA   | AGTGGTTTCAGGGCTCC     | 209 bp    | OK                          |

|                 |                         |                         |        |    |
|-----------------|-------------------------|-------------------------|--------|----|
| GREB1C          | TTGTTGTAGCTCTGGGAGCA    | CAACCAGCCAAGAGGCTAAG    | 249 bp | OK |
| GREB1C distal   | GAGCTGACCTTGTGGTAGGC    | GGTTTTTAAGCAGCCAGCAG    | 165 bp | OK |
| C2orf13         | GCCTTTGGGGATTGGTAGTT    | CCCTCCACGCCTACTAATGA    | 205 bp | OK |
| HIG2            | ACGCCTCGTCTCACTCCA      | CCTTATAGCCGCGAGCAC      | 214 bp | OK |
| LOC55954/ZMAT5  | GCTTGCTGGGATTCGTAGTC    | TCTCCAGAATTCCTGGCTGT    | 164 bp | OK |
| MAP2K7          | CCACCGTCCTCAGAAGAATG    | GAAGGATGACGCCACCTAGA    | 145 bp | OK |
| MAX             | CCCCACACACACTCACTC      | GCCGTCTGTTAGAGGGACAA    | 194 bp | OK |
| NR1D1           | CGACAAGACTGTCGGGATTT    | CTAAACACGCCACCCTGACT    | 152 bp | OK |
| C11orf4         | CGGACCCCATACAAGTAAA     | GCGTAAAACCGTACGAGAAT    | 164 bp | OK |
| BANP            | CGGAGTCCGGAGAGACTACA    | CAGTGGACGGTCTGAGGAAT    | 176 bp | OK |
| OVGP1           | CCCAGTGCAGGATCAGT       | TGGGGTTTCTCCCCATA       | 161 bp | OK |
| PHB             | CCTGCTTCCACTCTGACCTC    | TGCATTTAGCCCCAGAAAAC    | 299 bp | OK |
| PPP1R15A        | TCCGCGAGAAGTCCTGTC      | GTATCTCCGGCTGCCTCA      | 228 bp | OK |
| PSCD2           | GCGGAGAAGAAATGCAAAAAG   | GGGGCGGCTACTTTGTTAGT    | 163 bp | OK |
| RANBP3          | CAGTGGCAGCGACTAAGGTT    | GCTCCTAAGGCCGGTAAACT    | 231 bp | OK |
| RPS6KB1/TUBD1   | ACAAATGCGCATGTTCCATA    | GTCCGTGAAGCCAAACAGT     | 270 bp | OK |
| SMARCA4         | ATGGCACTTGGGAAGTTTTG    | GAGGCTCGGAAATAGGAACC    | 191 bp | OK |
| SYN1            | TCTGAGTGTGCTTCCAGTGC    | GATAGGGGATGCGCAATTT     | 215 bp | OK |
| RNF14           | TTTGTGAGGATTTCCAAGC     | GCAACCCTACCTCAGAGTGC    | 104 bp | OK |
| TFF1/pS2        | GCTTAGCCCTAGACGGAATGGGC | CCAGGTCTACTCATATCTGAGAG | 189 bp | OK |
| TFF1/pS2 distal | CTGGGTGACAGGAAAGAAGC    | CATTCTGGAAGGGACACACA    | 244 bp | OK |

## Quantitative RT-PCR

Total RNA was prepared from samples by the RNeasy® Mini Kit (Qiagen). One  $\mu$ g RNA was treated with DNase I (Invitrogen) to remove any trace of DNA. Quantitative PCR was performed by using SYBR Green (Stratagene) on a Mx300P System (Stratagene). The relative mRNA level was calculated by comparing with non-treatment or control, after normalization with *ACTB* mRNA levels.

| qRT-PCR PRIMERS LIST |                      |                      |           |                             |
|----------------------|----------------------|----------------------|-----------|-----------------------------|
| PROMOTER             | FORWARD PRIMER       | REVERSE PRIMER       | Band Size | Verification on agarose gel |
| <i>GREB1</i>         | GGCAGGACCAGCTTCTGA   | CTGTTCCACCACCTTGG    | 237bp     | OK                          |
| <i>MYC</i>           | CCTACCCTCTCAACGACAGC | CTCTGACCTTTTGCCAGGAG | 239 bp    | OK                          |
| <i>pS2/TFF1</i>      | TTGTGGTTTTCTGGTGTCA  | CCGAGCTCTGGGACTAATCA | 209bp     | OK                          |
| <i>CTSD</i>          | GGTGGCACAGACTCCAAGTA | ATGAGGGAAGTGCCTGTGTC | 162 bp    | OK                          |
| <i>WISP2</i>         | CTGTATCGGGAAGGGGAGAC | GGGAAGAGACAAGGCCAGAA | 247bp     | OK                          |
| <i>ACTB</i>          | GTGGGCATGGGTCAGAAG   | TCCATCACGATGCCAGTG   | 329bp     | OK                          |
|                      |                      |                      |           |                             |
|                      |                      |                      |           |                             |

## Clustering analysis

Binding profiles of di-methyl H3-K4, acetyl H3-K9, Pol II, and LSD1 were represented as 1 for binding and 0 for no binding. Expression profiles at 6 and 12 hr time points were represented as 1 for expression and 0 for no expression. All binary profiles were clustered using Pearson correlation and average-linkage hierarchical clustering (Eisen et al., 1998). Gene expression profiles of 79 normal human tissues were obtained from the Gene Expression Atlas available at <http://symatlas.gnf.org> (Su et al., 2004). Relative expression ratios were obtained by dividing each value by the row-wise average. Expression ratios were log transformed and median centered by genes and arrays. Unsupervised hierarchical clustering was performed using average-linkage clustering.

### Supplemental References

Eisen, M.B., Spellman, P.T., Brown, P.O., and Botstein, D. (1998). Cluster analysis and display of genome-wide expression patterns. *Proc. Natl. Acad. Sci. U.S.A.* 95, 14863-14868.

Jepsen, K., Hermanson, O., Onami, T.M., Gleiberman, A.S., Lunyak, V., McEvelly, R.J., Kurokawa, R., Kumar, V., Liu, F., Seto, E., et al. (2000). Combinatorial roles of the nuclear receptor corepressor in transcription and development. *Cell.* 102, 753-763.

Li, Z., Van Calcar, S., Ou, C., Cavenee, W.K., Zhang, M.O., and Ren, B. (2003). A global transcriptional regulatory role for c-Myc in Burkitt's lymphoma cells. *Proc. Natl. Acad. Sci. U.S.A.* 100: 8164-8169.

Ren, B. and Dynlacht, B.D. (2004). Use of chromatin immunoprecipitation assays in genome-wide location analysis of mammalian transcription factors. *Methods Enzymol.* 376: 304-315.

Su, A.I., Wiltshire, T., Batalov, S., Lapp, H., Ching, K.A., Block, D., Zhang, J., Soden, R., Hayakawa, M., Kreiman, G., et al., (2004). A gene atlas of the mouse and human proteinencoding transcriptomes. *Proc. Natl. Acad. Sci. U.S.A.* 101, 6062-6067.

**Figure S1. Test on efficiency and specificity of the guinea pig  $\alpha$ -LSD1 antibody generated.** (A) Western blot analysis with the  $\alpha$ -LSD1 antibody generated against bacterially-expressed LSD1 in MCF7 whole cell extract. (B) Immunostaining of overexpressed FLAG-LSD1 in 293 cells using  $\alpha$ -LSD1 and  $\alpha$ -Flag antibodies. DAPI staining control (left) and  $\alpha$ -LSD1/ $\alpha$ -Flag merged images (right) are shown. (C) Immunoprecipitation of LSD1 and coimmunoprecipitation of CoREST from MCF7 cellular extracts by using  $\alpha$ -LSD1 antibody. Actin control is also shown. (D) CHIP with  $\alpha$ -LSD1 antibody performed on previously-reported LSD1 genomic targets (Shi et al. 2004).

**Figure S2. Genomic localization of DSL probes relative to reported LSD1 binding sites.** (A) Only two previously-reported LSD1 genomic target sites were located <50bp from a DSL probe represented on the Hu20K array and their regulated gene showed similar expression status in MCF7 cells (top box): the repressed *SYN1* and *SCN3A* promoters; and both were LSD1<sup>+</sup> by ChIP-DSL. Another reported LSD1 target, the repressed *p57/CDKN1C*, was LSD1<sup>-</sup> (middle box); but the DSL probe was located >190bp from the PCR-amplified product reported by ChIP. Three other reported LSD1 targets: *SCN2A2*, *CHRM4*, and *SCN1A*, were located >1.5 Kbp from the DSL probe (middle box), thus indeed not being represented on the Hu20K array. Finally, two additionally genomic sites, located <50bp from the reported LSD1 binding site, showed a completely different expression status in MCF7 cells than when reported LSD1 targets: *PSA*, a prostate-specific gene, expressed in LNCaP, but not in MCF7 cells; and *FOS*, an expressed and E2-induced gene in MCF7 cells, but repressed when previously reported LSD1-target in 293 cells (bottom box). (B) BLAT search analysis showing

the genomic distances between reported LSD1-enriched genomic sites and DSL probes (UCSC Browser, <http://genome.ucsc.edu/>).

**Figure S3. Multiple neuronal NRSF/REST-target genes repressed in non-neuronal cells were detected as LSD1<sup>+</sup>.** (A) Partial list of literature-reported or computational-predicted NRSF/REST target genes within the group of LSD1<sup>+</sup>. (B) Average linkage hierarchical clustering of RNA transcript levels (upper panel) of 79 normal human tissues (bottom list) obtained from the Novartis v2 expression data set (GNF: <http://symatlas.gnf.org>) showing a cluster of neuronal-specific genes (II). Non-expressed genes in MCF7 cells from this cluster (data not shown) were classified based on their LSD1 recruitment status at P<0.0001 (left column): 94 LSD1<sup>+</sup> and 529 LSD1<sup>-</sup> genes. Motif analysis on the promoters of these genes showed a significant enrichment of NRSE/REST sites on the group of neuronal LSD1<sup>+</sup> genes (6.4% RE1-containing promoters) compared to a random selection of promoters (0.4% RE1-containing promoters). A significant enrichment was also observed for the group of neuronal LSD1<sup>-</sup> promoters (3.9% RE1-containing promoters), but this enrichment was lower, thus confirming an association between LSD1 binding and NRSF/REST enrichment.

**Figure S4. Knock down efficiency of specific siRNAs determined by Western blot analysis.** (A-B) Protein levels of LSD1 (A) and ESET (B) determined by Western blot using antibodies specific for the depleted proteins upon siRNA transfection. Protein levels of ER $\alpha$  were examined in cells treated with *LSD1* siRNA.

**Figure S5. LSD1-dependent regulation of an ERE-Luciferase reporter gene.** Luciferase assay using a multimerized ERE-*Luciferase* reporter gene vector to report ER $\alpha$ -dependent activation in cells overexpressing a wild-type or a mutant form of LSD1. Numbers refer to amounts of expression plasmid (ng). The data are the average of three replicates, and error bars represent  $\pm$  standard error mean.

**Figure S6. LSD1 regulates other induced transcriptional programs. (A).** Effect of *LSD1* siRNA on transcription units previously reported to be regulated by LSD1. The *PSA-LacZ* reporter activity is measured in LNCaP cells stimulated with DHT (left) and a multimerized RE1-LacZ reporter activity is measured in HeLa cells (right) upon siRNA microinjection. **(B)** Additional LSD1 regulated transcription units. The activity of *LacZ* reporters controlled by AP-1 (left), RARE (middle) or NF B (right) sites are measured in cells microinjected with a *LSD1* siRNA and stimulated by corresponding ligands (TPA, RA and TNF $\alpha$ ). **(C)** The effect of LSD1 depletion by siRNA on the activity of a *LacZ* reporter controlled by a CRE site upon forskolin treatment. **(D)** The effect of LSD1 depletion by siRNA on the activity of a *LacZ* reporter controlled by the *pS2* promoter upon E2 treatment. For all experiments, reporter plasmid and *LSD1* siRNA were delivered by single-cell nuclear microinjection in HeLa, LNCaP (in A), and MCF7 (in D) cells. For each reporter assay the nuclear receptor or transcription factor implicated has indicated. The data are the average of three replicates, and error bars represent  $\pm$  standard error mean.

**Figure S7. Ligand/signal-dependency imposed by the opposing functions of H3-K9 HMTs and LSD1 on distinct transcriptional programs. (A- B)** A *LacZ* reporter activity regulated



by the proximal *PSA* (A) or *E-selectin* (B) promoters was analyzed in cells treated with specific *H3-K9 HMTs* siRNAs, separately or together with *LSD1* siRNA in absence of ligand (DHT or TNF $\alpha$ ). (C) RT-qPCR analysis of an endogenous NF  $\kappa$ B-target gene induced by TNF $\alpha$  treatment upon *RIZ1/ESET* and/or *LSD1* siRNA transfection. (D) Functional *E-Selectin* promoter-*LacZ* reporter gene analysis of NF $\kappa$ B (p50/p65 factors)-dependency in absence of signal (TNF $\alpha$ ) and specific H3-K9 HMTs. In A, B, and D, reporter plasmid and siRNAs were delivered by single-cell nuclear microinjection in HeLa cells. In C, siRNAs was delivered by transient transfection in HeLa cells. The data are the average of three replicates, and error bars represent  $\pm$  standard error mean.

**A** WB (MCF7 cells)

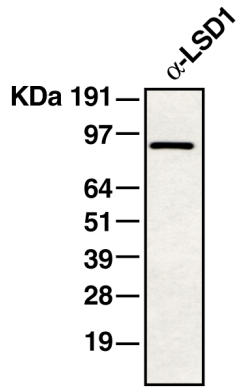

**B** Immunofluorescence (293 cells)

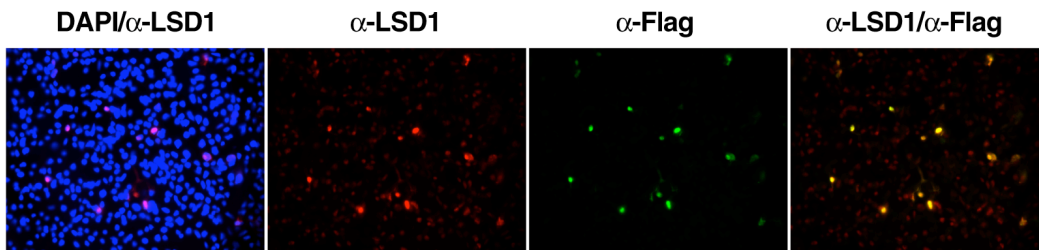

**C** IP (MCF7 cells)

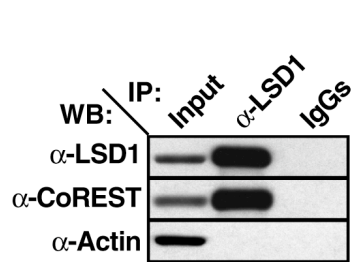

**D** ChIP (HeLa cells)

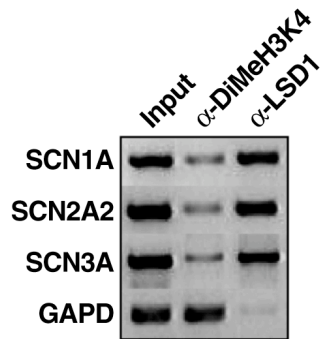

**A**

**Situation of the Reported LSD1-Regulated Target Genes in the CHIP-DSL Experiment**

| Target Gene | DSL Probe & Reported LSD1 Binding Site Distances | Gene Status when LSD1 Bound | Gene Status in MCF7 Cells | CHIP DSL Results | Reference |
|-------------|--------------------------------------------------|-----------------------------|---------------------------|------------------|-----------|
|-------------|--------------------------------------------------|-----------------------------|---------------------------|------------------|-----------|

*Reported LSD1 Target Sites Represented on the Hu20K Array*

|              |             |           |           |       |                             |
|--------------|-------------|-----------|-----------|-------|-----------------------------|
| <i>SYN1</i>  | Overlapping | Repressed | Repressed | LSD1+ | Hakimi <i>et al.</i> , 2002 |
| <i>SCN3A</i> | < 50 bp     | Repressed | Repressed | LSD1+ | Shi <i>et al.</i> , 2004    |

*Reported LSD1 Target Sites Non-represented on the Array*

|                      |           |           |           |         |                          |
|----------------------|-----------|-----------|-----------|---------|--------------------------|
| <i>p57/CDKN1C</i>    | > 190 bp  | Repressed | Repressed | LSD1-   | Shi <i>et al.</i> , 2004 |
| <i>SCN2A2</i>        | > 1.5 Kbp | Repressed | Repressed | Too Far | Shi <i>et al.</i> , 2004 |
| <i>M4 AChR/CHRM4</i> | > 4 Kbp   | Repressed | Repressed | Too Far | Shi <i>et al.</i> , 2004 |
| <i>SCN1A</i>         | > 50 Mbp  | Repressed | Repressed | Too Far | Shi <i>et al.</i> , 2004 |

*Reported LSD1 Target Sites Regulating Genes with Different Transcription Status in MCF7 Cells*

|              |             |                     |           |       |                              |
|--------------|-------------|---------------------|-----------|-------|------------------------------|
| <i>PSA</i>   | Overlapping | Activated/Repressed | Repressed | LSD1- | Metzger <i>et al.</i> , 2005 |
| <i>c-FOS</i> | Overlapping | Repressed           | Activated | LSD1+ | Hakimi <i>et al.</i> , 2003  |

**B**

**Relative Genomic Localization of DSL Probes and Reported LSD1 Binding Sites**

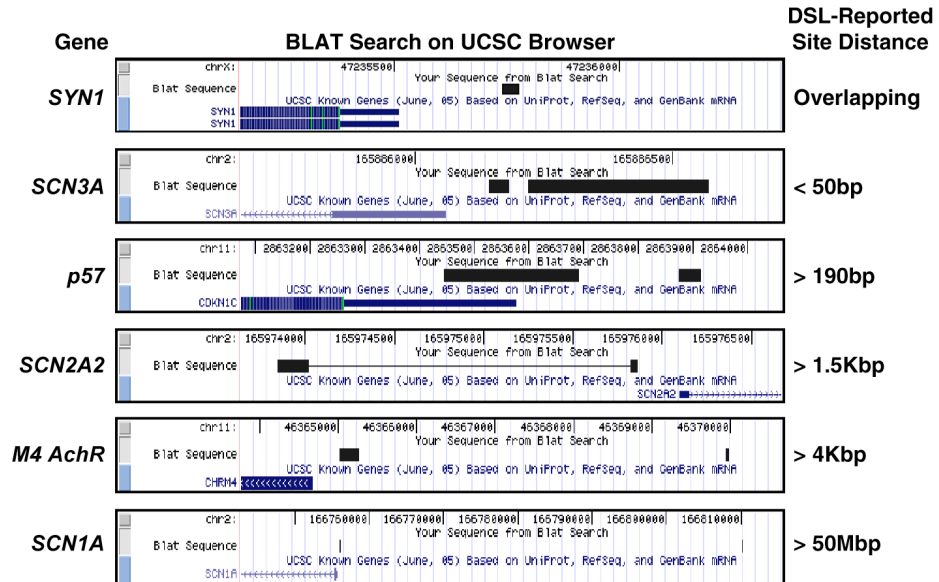

**B**

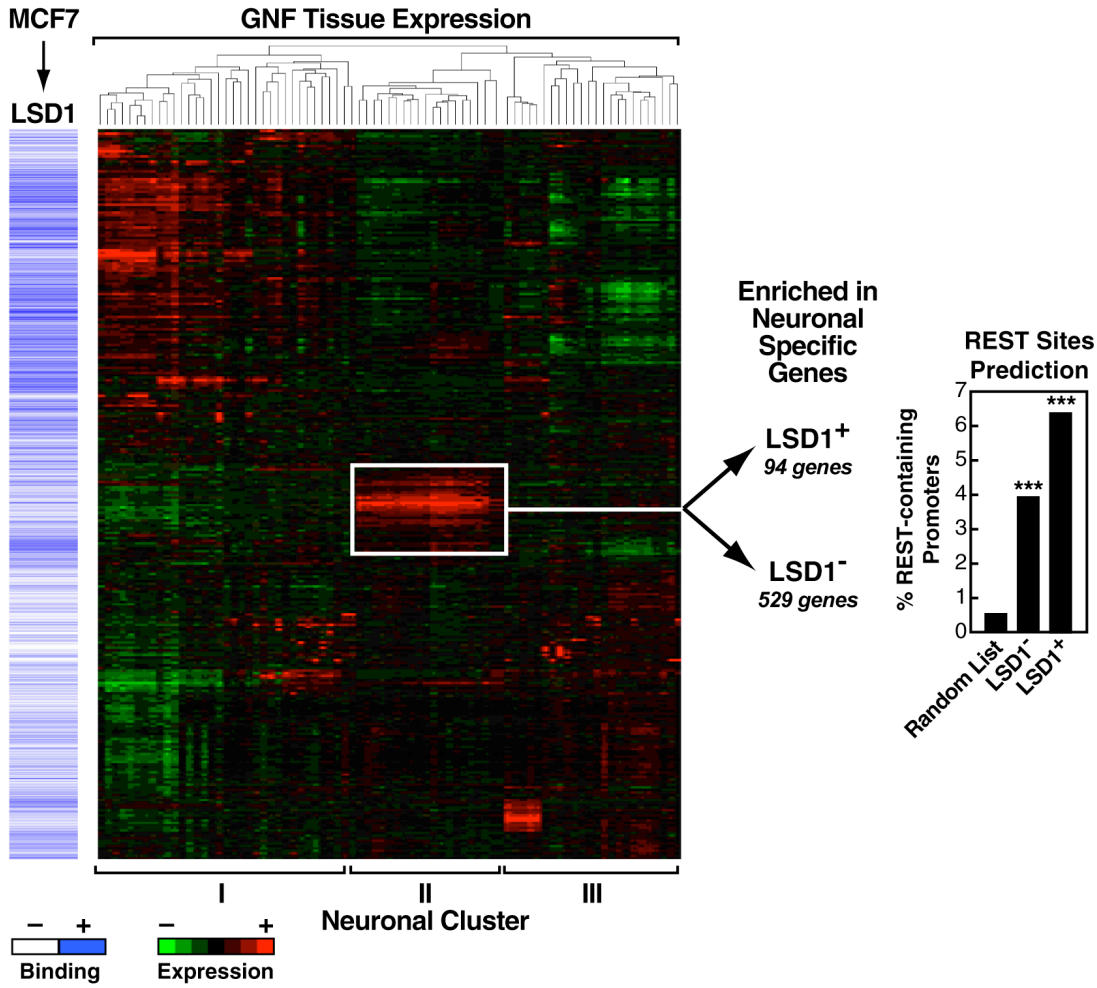

**GNF Tissues (From left to right, above)**

|            |                                                                                                                                                                                                                                                             |                                                                                                                                                                                                                                                                       |                                                                                                                                 |
|------------|-------------------------------------------------------------------------------------------------------------------------------------------------------------------------------------------------------------------------------------------------------------|-----------------------------------------------------------------------------------------------------------------------------------------------------------------------------------------------------------------------------------------------------------------------|---------------------------------------------------------------------------------------------------------------------------------|
| <b>I</b>   | Whole Blood<br>BM-CD33+Myeloid<br>PB-CD14+ Monocytes<br>PB-BDCA4+Dendritic Cells<br>PB-CD4+T cells<br>PB-CD8+T cells<br>PB-CD19+B cells<br>BM-CD105+Endothelial<br>BM-CD34+<br>721 B lymphoblasts<br>Leukemialymphoblastic (molt 4)<br>lymphomaburkittsRaji | leukemiapromyelocytic (h160)<br>lymphomaburkittsDaudi<br>Leukemiachronicmyelogenous (k562)<br>BM-CD71+Early erythroid<br>Thymus<br>Tonsil<br>Lymphnode<br>Bone marrow<br>Colorectal adenocarcinoma<br>Cardiac myocytes<br>Smooth muscle<br>Bronchial epithelial cells | Adipocytes<br>Uterus<br>Lung<br>Prostate<br>Thyroid<br>Fetal lung<br>Placenta<br>Fetal thyroid<br>Pancreas<br>Pancreatic islets |
| <b>II</b>  | Cerebellum peduncles<br>Cerebellum<br>Globus pallidus<br>Subthalamic nucleus<br>Temporal lobe<br>Pons<br>Parietal lobe                                                                                                                                      | Medulla oblongata<br>Cingulate cortex<br>Caudate nucleus<br>Whole brain<br>Amygdala<br>Prefrontal cortex<br>Occipital lobe                                                                                                                                            | Hypothalamus<br>Thalamus<br>Fetal brain<br>Spinal cord<br>Olfactory bulb<br>Pituitary                                           |
| <b>III</b> | Testis<br>Testis germ line<br>Testis leydig cell<br>Testis interstitial<br>Testis seminiferous tubule<br>Fetal liver<br>Heart<br>Liver<br>Kidney                                                                                                            | Adrenal gland<br>Adrenal cortex<br>Salivary gland<br>Trachea<br>Ovary<br>Appendix<br>Trigeminal ganglion<br>Superior cervical ganglion<br>Skin                                                                                                                        | Ciliary ganglion<br>Atrio ventricular node<br>DRG<br>Uterus corpus<br>Skeletal muscle<br>Tongue                                 |

**A**

**Partial list of LSD1<sup>+</sup> that were known or predicted REST regulated genes**

|                |                                              |
|----------------|----------------------------------------------|
| <b>SCN3A</b>   | Brain II voltage-gated Na channel            |
| <b>SYN1</b>    | Synapsin I                                   |
| <b>PAX4</b>    | Paired box gene 4                            |
| <b>CX36</b>    | Connexin 36                                  |
| <b>CRH</b>     | Corticotropin releasing hormone              |
| <b>DNM1</b>    | Dynamin 1                                    |
| <b>HTR6</b>    | Serotonin receptor 6                         |
| <b>GRID1</b>   | Glutamate ionotropic $\delta$ 1 receptor     |
| <b>SYT2</b>    | Synaptotagmin II                             |
| <b>KC NMA1</b> | K-large conductance Ca-activated channel     |
| <b>BAI1</b>    | Brain-specific angiogenesis inhibitor 2      |
| <b>PLXND1</b>  | Plexin D1                                    |
| <b>NCAM2</b>   | Neural cell adhesion molecule 2              |
| <b>LRRN6A</b>  | Leucine rich repeat neuronal 6A              |
| <b>KIA1893</b> | Inducer of neurite outgrowth 1               |
| <b>MLK2</b>    | Mixed lineage kinase 2                       |
| <b>NOVA1</b>   | Neuro-oncological ventral antigen 1          |
| <b>NMU</b>     | Neuromedin U                                 |
| <b>SLC1A1</b>  | Neuronal high affinity glutamate transporter |
|                | Some other REST regulated genes P<0.0009     |
| <b>SNAP25</b>  | Synaptosomal-associated protein 26KDa        |
| <b>CALB1</b>   | Calbindin 28K                                |
| <b>NPTXR</b>   | Neuronal pentraxin receptor                  |
| <b>SCG10</b>   | Superior cervical ganglion-10                |

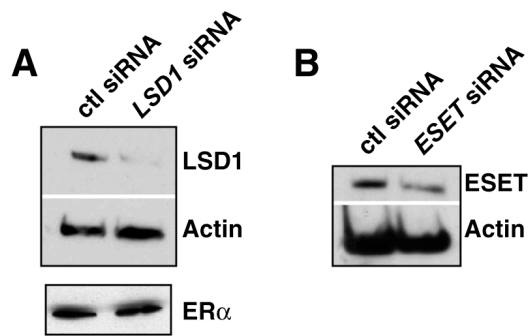

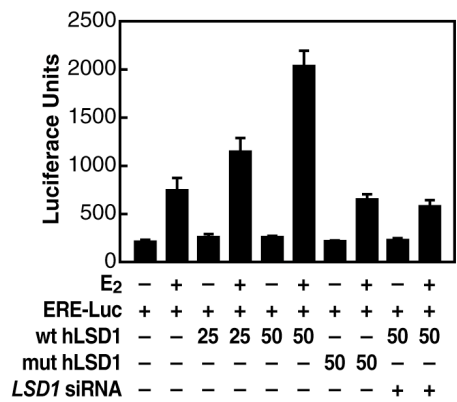

**A**

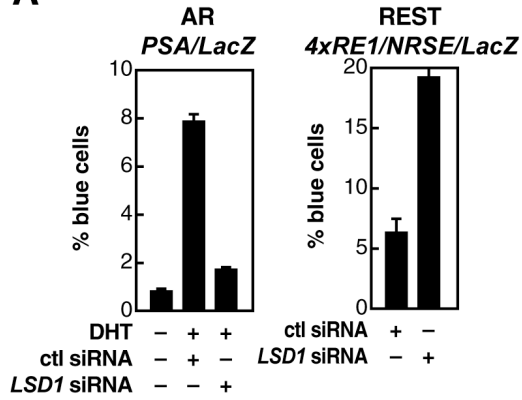

**B**

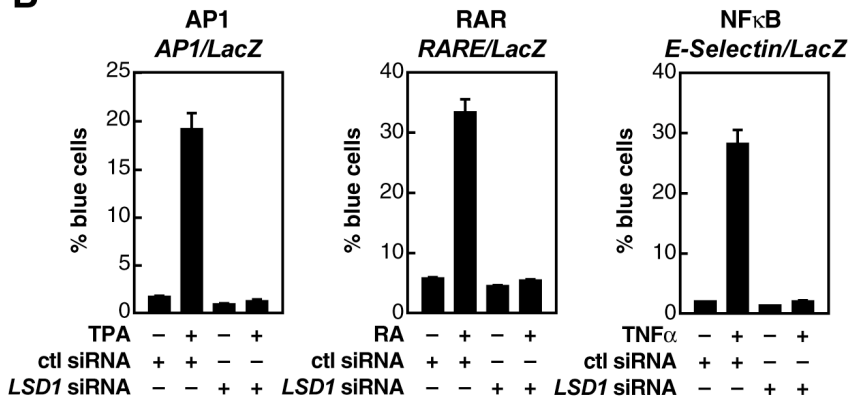

**C**

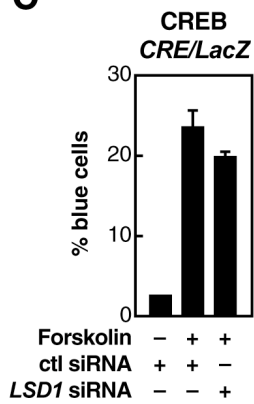

**D**

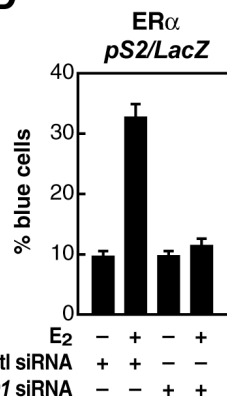

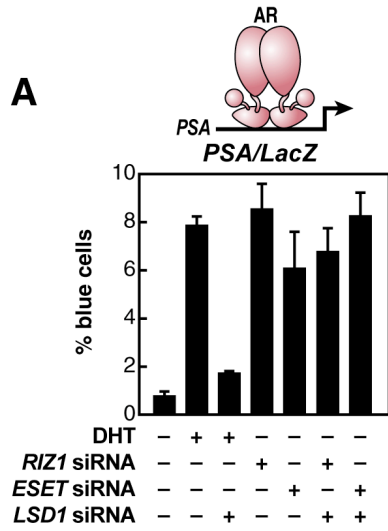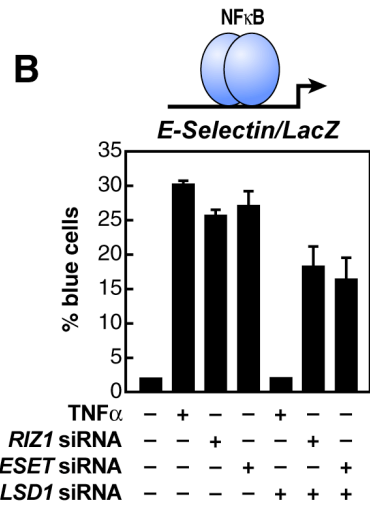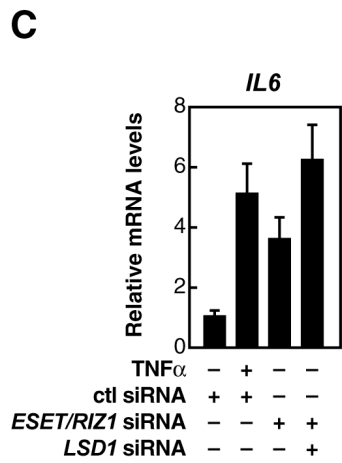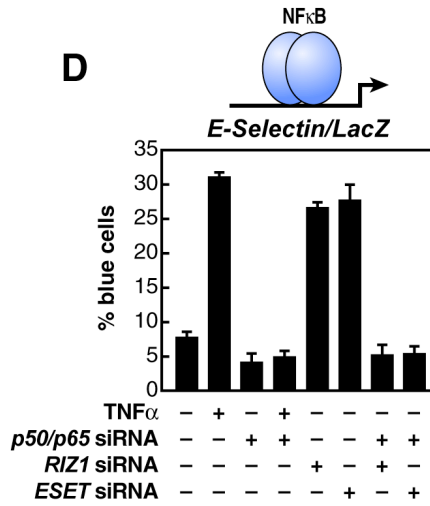

Supplement: NIHMS21975-supplement-Supp_Text_and_.pdf [file NIHMS21975-supplement-Supp_Text_and_.pdf]
